# Supplementary material for: Xanthophyllomyces dendrorhous-Derived Astaxanthin Regulates Lipid Metabolism and Gut Microbiota in Obese Mice Induced by A High-Fat Diet
Source: PubMed Central journal article supplement (PMC6627754; doi:10.3390/md17060337), 2019-06-05
Supplement: marinedrugs-17-00337-s001.pdf [file marinedrugs-17-00337-s001.pdf]

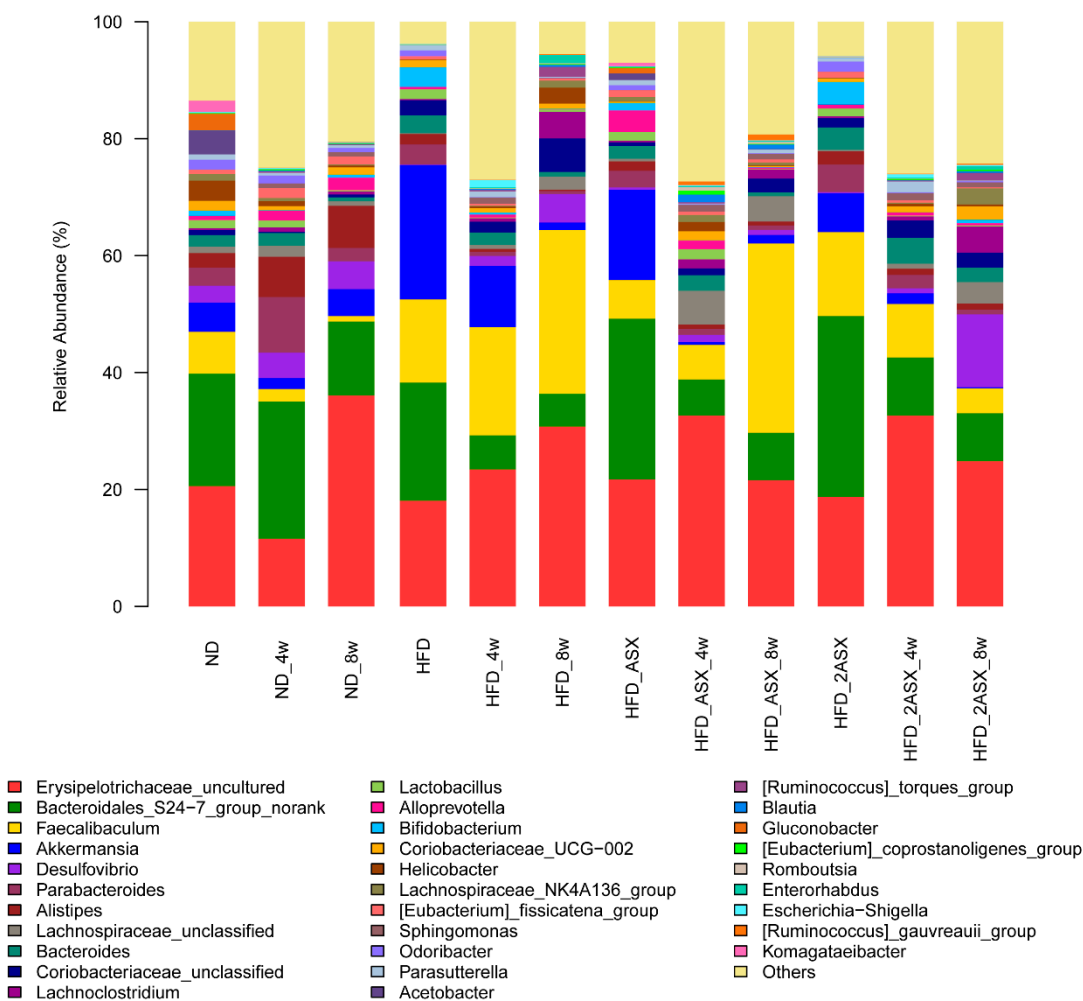

Figure S1: Effects of astaxanthin on gut microbiota at the genus level of the mice fed with a high-fat diet

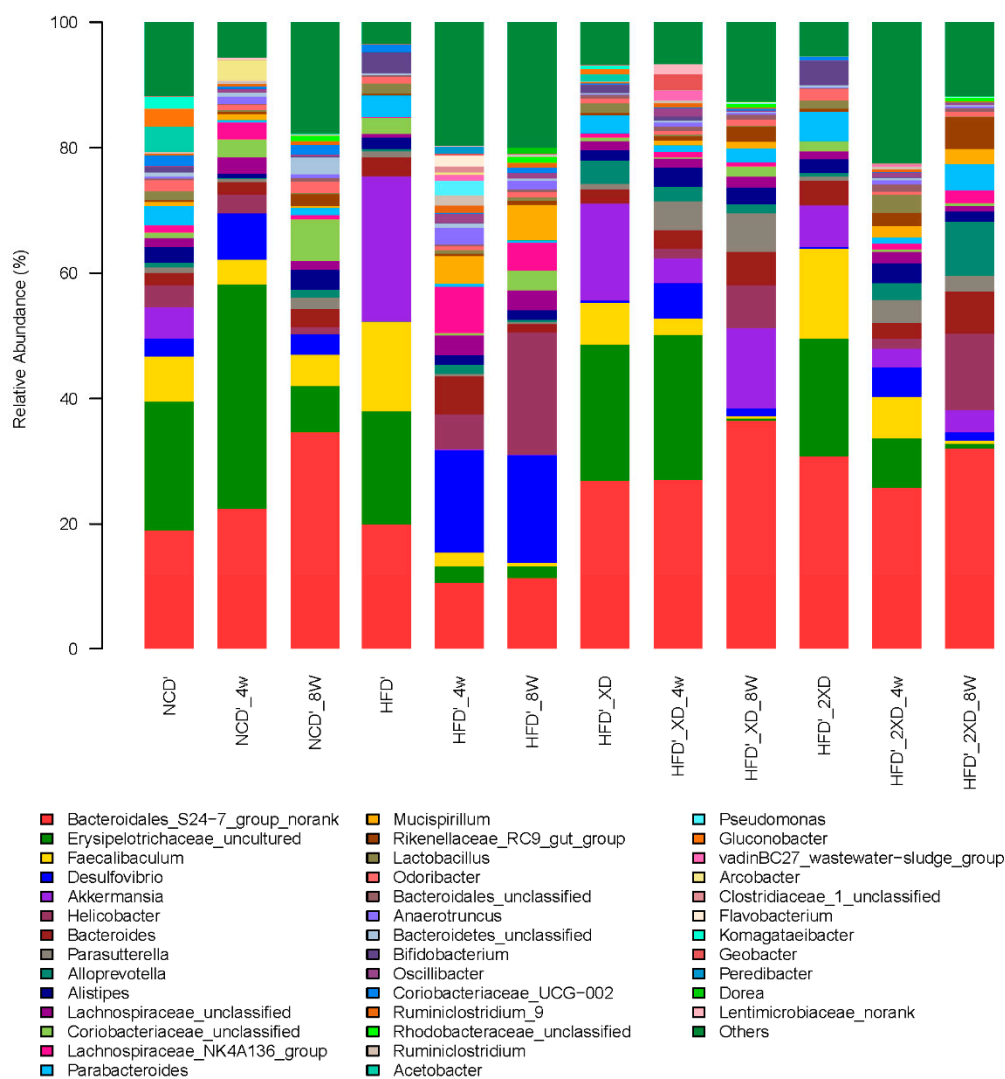

Figure S2: Effects of *X. dendrorhous* powder on gut microbiota at the genus level of the mice fed with a high-fat diet

Table S1: The composition of the experimental diets.

| ingredient                | NCD/g  | HFD/g  |
|---------------------------|--------|--------|
| casein                    | 189.58 | 233.06 |
| L-cystine                 | 2.84   | 3.5    |
| cornstarch                | 298.59 | 84.83  |
| maltodextrin              | 33.18  | 116.53 |
| sucrose                   | 331.77 | 201.36 |
| cellulose                 | 47.4   | 58.26  |
| soybean oil               | 23.7   | 29.13  |
| lard                      | 18.96  | 206.84 |
| M1002 mineral mix         | 9.48   | 11.65  |
| calcium hydrogenphosphate | 12.32  | 15.15  |
| calcium carbonate         | 5.21   | 6.41   |
| potassium citrate         | 15.64  | 19.23  |
| V1001 vitamin mixture     | 9.48   | 11.56  |
| choline bitartrate        | 1.9    | 2.33   |
| food dye                  | 0.047  | 0.058  |
| total                     | 1000   | 1000   |
